# Supplementary material for: Inhibition of Carotenoid Biosynthesis by CRISPR/Cas9 Triggers Cell Wall Remodelling in Carrot
Source: MDPI journal article supplement (doi:10.3390/ijms22126516), 2021-06-17
Supplement: s1 [file s1]

**A**

|              |       |                                                     |               |            |
|--------------|-------|-----------------------------------------------------|---------------|------------|
|              |       | <b>1</b>                                            | <b>gRNA 1</b> | <b>51</b>  |
| psy1/g1/WT   |       | MACNFAVRVIYYPKEIHGVSVLNTRSRKSRFSCRMKLSTGVSAAVNPV    |               |            |
| psy1/g1/o27  | [+1]  | MACNFAVRVIYYPKEILWGFCVEHK*E*KE*I*LQGYEAVHWSVSCGS*SC |               |            |
|              |       | <b>239</b>                                          | <b>gRNA 2</b> | <b>289</b> |
| psy1/g2/WT   |       | LMSVPVMGIAPESKATTESVYSAALALGIANQLTNILRDVGEDARRGRIYL |               |            |
| psy1/g2/o27  | [-11] | LMSVPVMGIA--RHHRECLQCSFSPRNC*SAY*HSP*CWRRC*ERENISA  |               |            |
| psy1/g2/o27  | [G/A] | LMSVPVMGIAPKSKATTESVYSAALALGIANQLTNILRDVGEDARRGRIYL |               |            |
| psy1/g2/o28  | [-1]  | LMSVPVMGIAPDQRPQRFVTVQL*PSELLISLLTFSVMLEKMLGEGEYIC  |               |            |
| psy1/g2/o28  | [G/A] | LMSVPVMGIAPKSKATTESVYSAALALGIANQLTNILRDVGEDARRGRIYL |               |            |
| psy1/g2/o29  | [-2]  | LMSVPVMGIAPVKGHHRECLQCSFSPRNC*SAY*HSP*CWRRC*ERENISA |               |            |
| psy1/g2/o186 | [-3]  | LMSVPVMGIAP-AKATTESVYSAALALGIANQLTNILRDVGEDARRGRIYL |               |            |
| psy1/g2/o186 | [-6]  | LMSVPVMG--LPKATTESVYSAALALGIANQLTNILRDVGEDARRGRIYL  |               |            |
| psy1/g2/o186 | [-10] | LMSVPVMG---NQRPPQRFVTVQL*PSELLISLLTFSVMLEKMLGEGEYIC |               |            |
| psy1/g2/o186 | [G/A] | LMSVPVMGIAPESKATTESVYSAALALGIANQLTNILRDVGEDARRGRIYL |               |            |
| psy1/g2/o186 | [C/A] | LMSVPVMGIATESKATTESVYSAALALGIANQLTNILRDVGEDARRGRIYL |               |            |
| psy1/g2/o196 | [+1]  | LMSVPVMGIAPEIKGHHRECLQCSFSPRNC*SAY*HSP*CWRRC*ERENIS |               |            |
| psy1/g2/o196 | [-16] | LMSVPVMGIAP-----QRFVTVQL*PSELLISLLTFSVMLEKMLGEGEYIC |               |            |
| psy1/g2/o196 | [-20] | LMSVPVMG-----HHRECLQCSFSPRNC*SAY*HSP*CWRRC*ERENIS   |               |            |
| psy1/g2/o196 | [G/A] | LMSVPVMGIAPKSKATTESVYSAALALGIANQLTNILRDVGEDARRGRIYL |               |            |

**B**

|              |           |                                                     |               |            |
|--------------|-----------|-----------------------------------------------------|---------------|------------|
|              |           | <b>23</b>                                           | <b>gRNA 1</b> | <b>73</b>  |
| psy2/g1/WT   |           | ETAREGTRVLDPSRLGSRDKNMRCGGRLEKGLRKWSSKSFNAEYSYSCLG  |               |            |
| psy2/g1/o270 | [+1]      | ETAREGTRVLDPSRLGFPG*EYEVWRQT*EG*AAEVEF*IFQC*I*LFVFG |               |            |
| psy2/g1/o270 | [+1]      | ETAREGTRVLDPSRLGYPG*EYEVWRQT*EG*AAEVEF*IFQC*I*LFVFG |               |            |
| psy2/g1/o270 | [-4]      | ETAREGTRVLDPSRLGWIRI*GVEADLRVSCGSGVLNLSMLNIAIRVWV   |               |            |
| psy2/g1/o270 | [-286]    | ETAREGTRVLDPSRLG-----                               |               |            |
| psy2/g1/o280 | [-42]     | ETAR-----DKNMRCGGRLEKGLRKWSSKSFNAEYSYSCLG           |               |            |
| psy2/g1/o280 | [-81]     | ETAREGTRVLDPS-----FNAEYSYSCLG                       |               |            |
| psy2/g1/o280 | [-81]     | ETAREGTRVLDLS-----FNAEYSYSCLG                       |               |            |
| psy2/g1/o293 | [+1, C/A] | ETAREGTRVLDPSRLGYQG*EYEVWRQT*EG*AAEVEF*IFQC*I*LFVFG |               |            |
| psy2/g1/o298 | [-27]     | ETAREGTRVLDPSR-----CGGRLEKGLRKWSSKSFNAEYSYSCLG      |               |            |
| psy2/g1/o298 | [C/T]     | ETAREGTRVLDPSRLGFRDKNMRCGGRLEKGLRKWSSKSFNAEYSYSCLG  |               |            |
|              |           | <b>119</b>                                          | <b>gRNA 2</b> | <b>169</b> |
| psy2/g2/WT   |           | QFRSDEELEVKEPILPGTSLSLSEAYDRCEVCAEYAKTFYLGTLTMTPE   |               |            |
| psy2/g2/o270 | [-1]      | QFRSDEELEVKEPILRGL*AC*VKLMIDAVKYVLSMPKHFTWEHY**PQR  |               |            |
| psy2/g2/o270 | [-1]      | QFRSDEELEVKEPILRGL*AC*VKLMIDAVKYVLSMPKHFTWEHY**PQR  |               |            |
| psy2/g2/o270 | [-286]    | -----FRGL*AC*VKLMIDAVKYVLSMPKHFTWEHY**PQR           |               |            |
| psy2/g2/o270 | [dup]     | QFRSDEELEVKEPILPG*EYEVWRQT*EG*AAEVEF*IFQC*I*LFVFGW  |               |            |
| psy2/g2/o280 | [-1]      | QFRSDEELEVKEPILRGL*AC*VKLMIDAVKYVLSMPKHFTWEHY**PQR  |               |            |
| psy2/g2/o280 | [+1]      | QFRSDEELEVKEPILAGDSELVK*SL*SMR*SMC*VCQNILLGNTTDDPR  |               |            |
| psy2/g2/o280 | [-73]     | QFRSD-----AVKYVLSMPKHFTWEHY**PQR                    |               |            |
| psy2/g2/o293 | [+1]      | QFRSDEELEVKEPILAGDSELVK*SL*SMR*SMC*VCQNILLGNTTDDPR  |               |            |
| psy2/g2/o293 | [+1]      | QFRSDEELEVKEPILSGDSELVK*SL*SMR*SMC*VCQNILLGNTTDDPR  |               |            |
| psy2/g2/o298 | [+1]      | QFRSDEELEVKEPILTGSELVK*SL*SMR*SMC*VCQNILLGNTTDDPR   |               |            |
| psy2/g2/o298 | [-2]      | QFRSDEELEVKEPIL-PGDSELVK*SL*SMR*SMC*VCQNILLGNTTDDPR |               |            |
| psy2/g2/o298 | [-2]      | QFRSDEELEVKEPIL-GDSELVK*SL*SMR*SMC*VCQNILLGNTTDDPR  |               |            |
| psy2/g2/o298 | [-32]     | QFRSDEELEVK-----VK*SL*SMR*SMC*VCQNILLGNTTDDPR       |               |            |
| psy2/g2/o306 | [+1]      | QFRSDEELEVKEPILSGDSELVK*SL*SMR*SMC*VCQNILLGNTTDDPR  |               |            |
| psy2/g2/o306 | [-1]      | QFRSDEELEVKEPILRGL*AC*VKLMIDAVKYVLSMPKHFTWEHY**PQR  |               |            |

**Figure S1** Amino acid sequences of PSY in the wild type (WT; not transformed control) and mutant lines. The sequence changes in mutants in comparison to WT are marked in red. (A) Sequences of PSY1 in psy1-g1g2 lines. (B) Sequences of PSY2 in psy2-g1g2 lines.

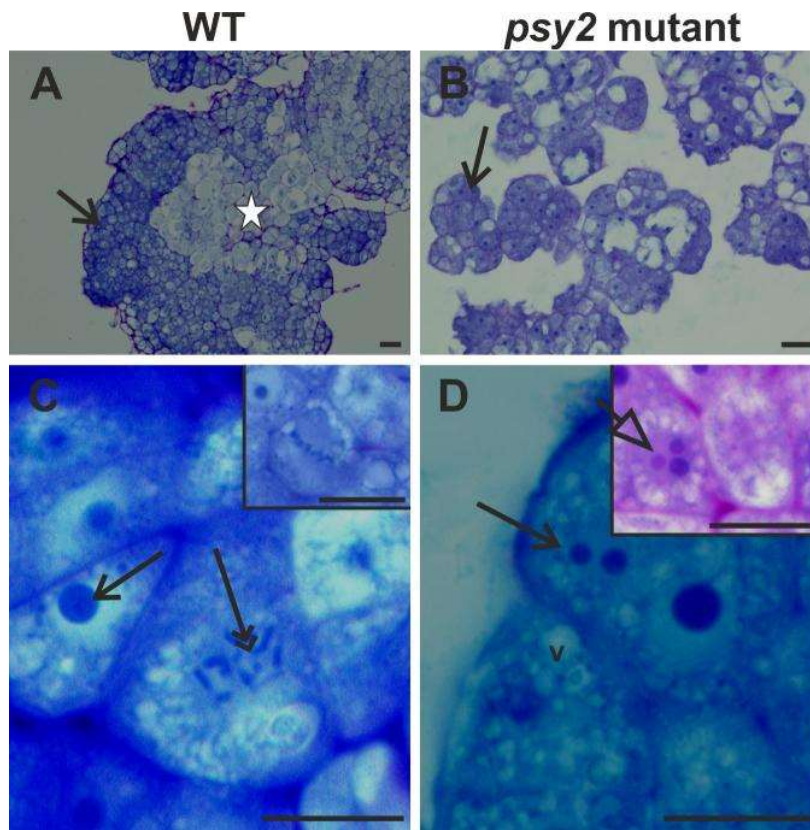

**Figure S2** Morphology and structure of (A and C) the wild type (WT; not transformed control) and (B and D) *psy2* mutant callus. (A) Dividing cells (arrow) localized at the periphery of callus clumps surrounding the parenchymatic cells (white star). (B) *psy2* mutant callus composed mainly of dividing cells (arrow) characterised by dense cytoplasm. (C) The dividing WT cells were characterised by large nucleus with prominent nucleolus (arrow), and numerous cells in different phases of mitosis (double arrow; inset – metaphase plate). (D) *psy2* mutant callus cells with different number of nuclei (two nuclei – arrow; three nuclei – inset, empty arrow) and numerous small vacuoles (v). Scale bars = 20  $\mu\text{m}$ .

**Table S1** Primers used for PCR and qPCR

| Amplified fragment         | Primer name | Primer sequence 5' - 3'    |
|----------------------------|-------------|----------------------------|
| <i>aph</i>                 | aph-F       | AAGGAATCGGTCAATACACTACATGG |
|                            | aph-R       | AAGACCAATGCGGAGCATATACG    |
| 35S: <i>Cas9</i>           | CaMV-35S-F  | CCACGTCTTCAAAGCAAGTGG      |
|                            | AteCas9-R   | TTGGGTGTCTCTCGTGCTTC       |
| <i>psy1</i> (gRNA1 region) | psy1-F1     | ACAACCCAACTCAACTCTCTCT     |
|                            | psy1-R1     | TACTCAGCACAAACTTCGCCA      |
| <i>psy1</i> (gRNA2 region) | psy1-F2     | CCTCCCATATCACGCCCAAG       |
|                            | psy1-R2     | ACTCTTCTCCAACATCACGG       |
| <i>psy2</i> (gRNA1+gRNA2)  | psy2-F      | GTTGGTGTGAATGGTTGAGGC      |
|                            | psy2-R      | AGTAATTTAGAGGCAGTCAGCA     |
| <i>psy1</i> (qPCR)         | psy1-qpcr-F | GGGAATAACACCAGAATAC        |
|                            | psy1-qpcr-R | ATCTACTTGCTGAACTTAAC       |
| <i>psy2</i> (qPCR)         | psy2-qpcr-F | TATGTTGCTGGTACTGTTGG       |
|                            | psy2-qpcr-R | CGTTGTTGCCTGTGAATTAG       |

**Table S2**

Cellular epitopes localization and degree of their occurrence within the callus of different lines

| Epitope         | WT                                                                                           | <i>psy2</i> mutant                                                                           |
|-----------------|----------------------------------------------------------------------------------------------|----------------------------------------------------------------------------------------------|
| <b>pectins</b>  |                                                                                              |                                                                                              |
| JIM5            | walls, intercellular spaces<br>+++                                                           | walls, cytoplasmic compartments<br>+                                                         |
| JIM7            | walls, cytoplasmic compartments and<br>secreted outside the walls of peripheral cells<br>+++ | walls, cytoplasmic compartments and<br>secreted outside the walls of peripheral cells<br>+++ |
| <b>AGPs</b>     |                                                                                              |                                                                                              |
| JIM13           | walls,<br>cytoplasmic compartments<br>+++                                                    | walls,<br>cytoplasmic compartments in selected cells<br>+                                    |
| LM2             | walls,<br>cytoplasmic compartments<br>+                                                      | present in new cell walls,<br>cytoplasmic compartments in some cells<br>+/-                  |
| <b>extensin</b> |                                                                                              |                                                                                              |
| JIM20           | walls, intercellular spaces<br>-                                                             | extracellular location<br>+                                                                  |

The percentage of cells that contain the epitope was taken into account: – no labelling, indicates the lack of epitope or the presence below 1% of cells, +/- weak labelling indicates the presence of the epitope between 2-10% of callus cells, + moderate labelling indicates the presence of epitope between 20-40% of callus cells, and +++ 100% callus cells expressing the epitope; the values are derived from three samples of each type of callus.
